# Supplementary material
Source: HighWire-hosted journal article supplement (https://jme.bmj.com/highwire/filestream/151400/field_highwire_adjunct_files/0/medethics-2021-107702supp001_data_supplement.pdf)

**SUPPLEMENTARY FIGURE 1. PRISMA DIAGRAM REFLECTING SEARCH STRATEGY.**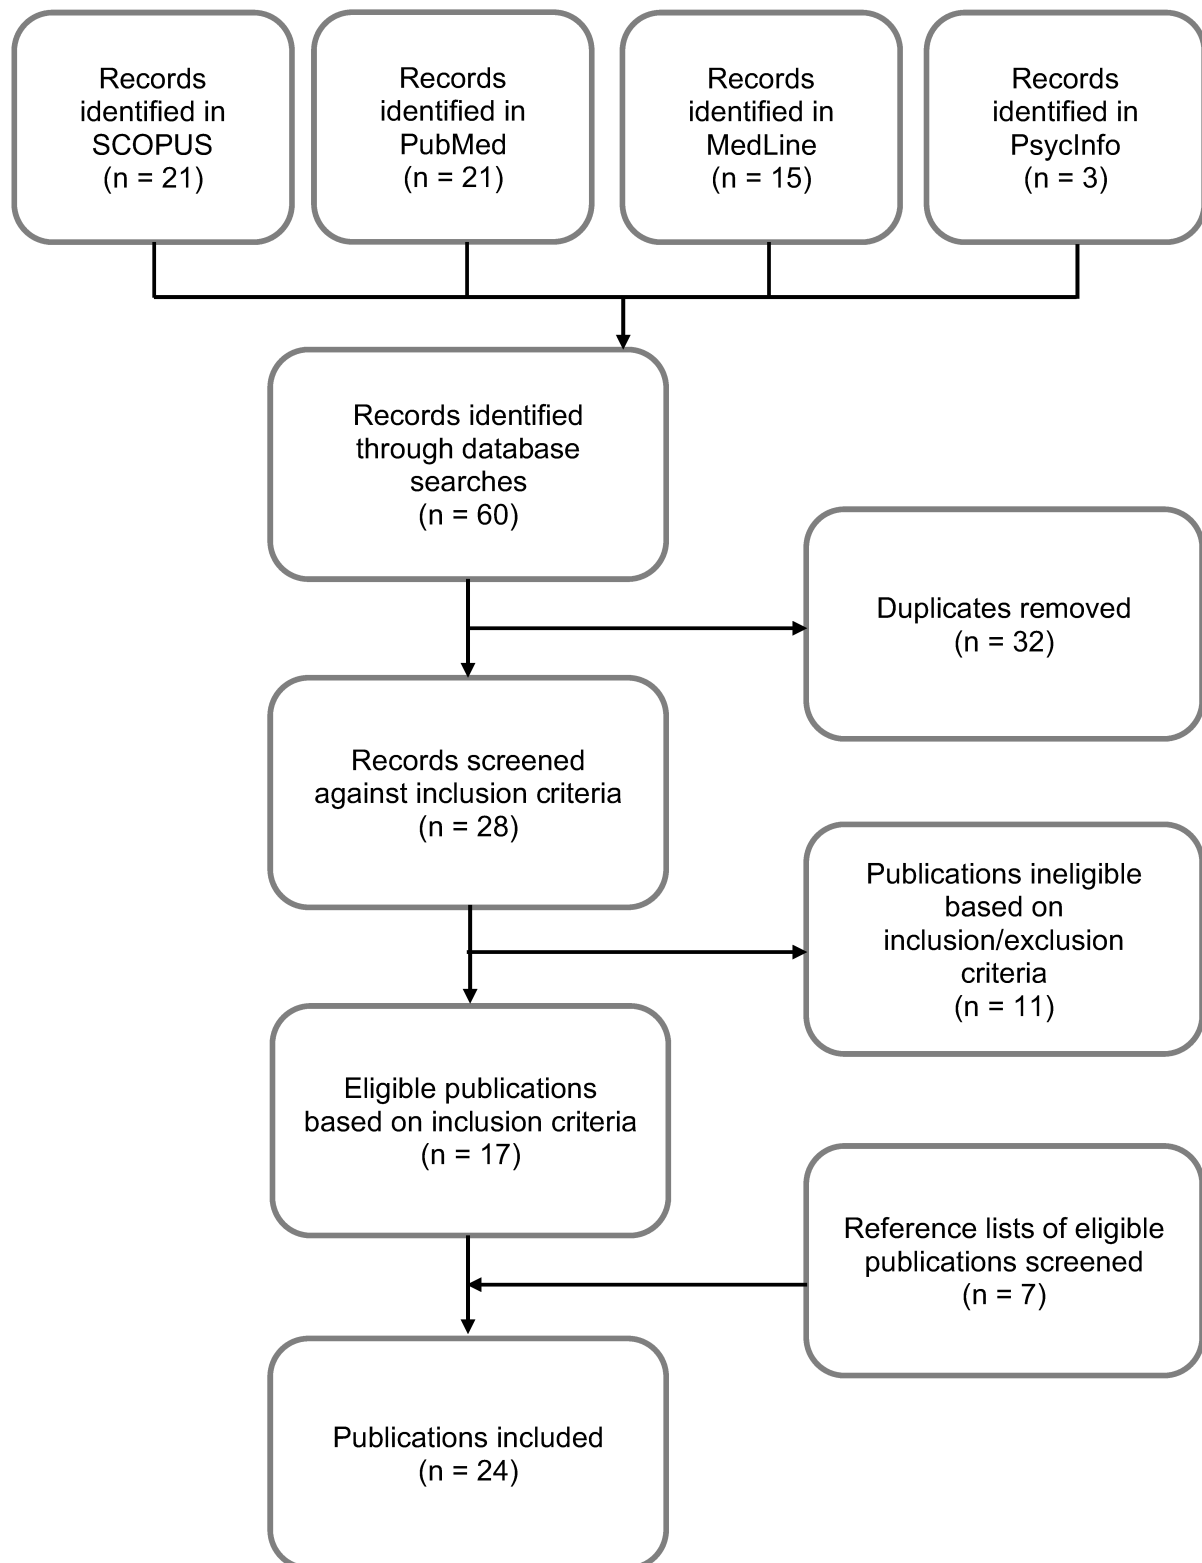

Supplement: medethics-2021-107702supp001_data_supplement.pdf [file medethics-2021-107702supp001_data_supplement.pdf]
